# Supplementary material for: Screening the Significant Hub Genes by Comparing Tumor Cells, Normoxic and Hypoxic Glioblastoma Stem-like Cell Lines Using Co-Expression Analysis in Glioblastoma
Source: MDPI journal article supplement (doi:10.3390/genes13030518), 2022-03-15
Supplement: s1 [file s1]

## Supplementary Materials

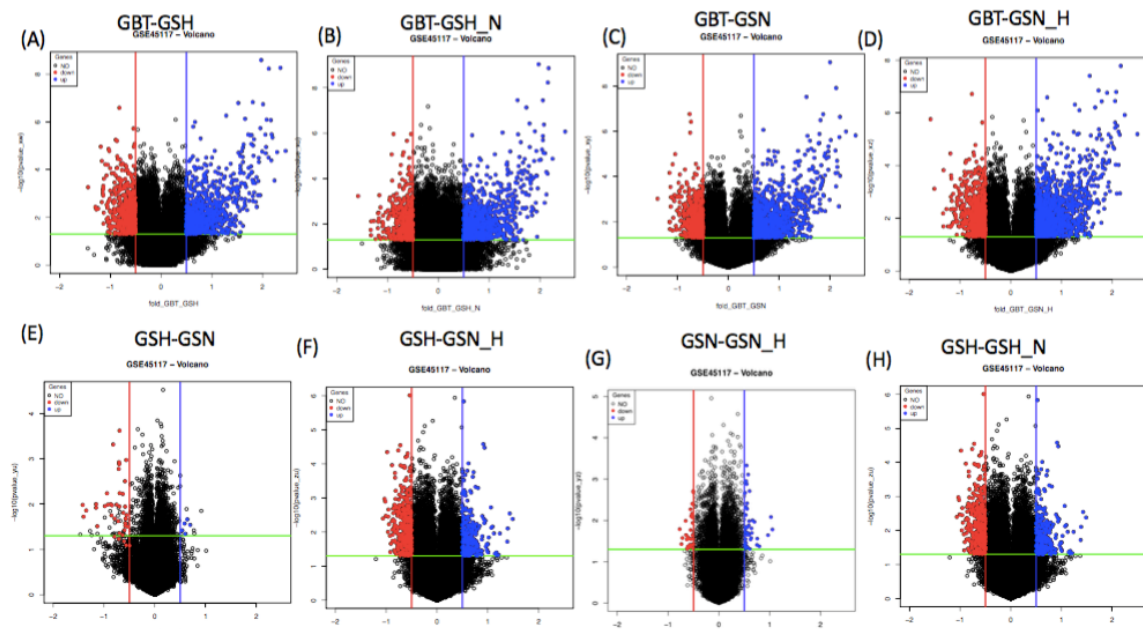

**Figure S1.** Volcano plots of each paired treatments of DEGs of GSE45117 gene expression dataset.

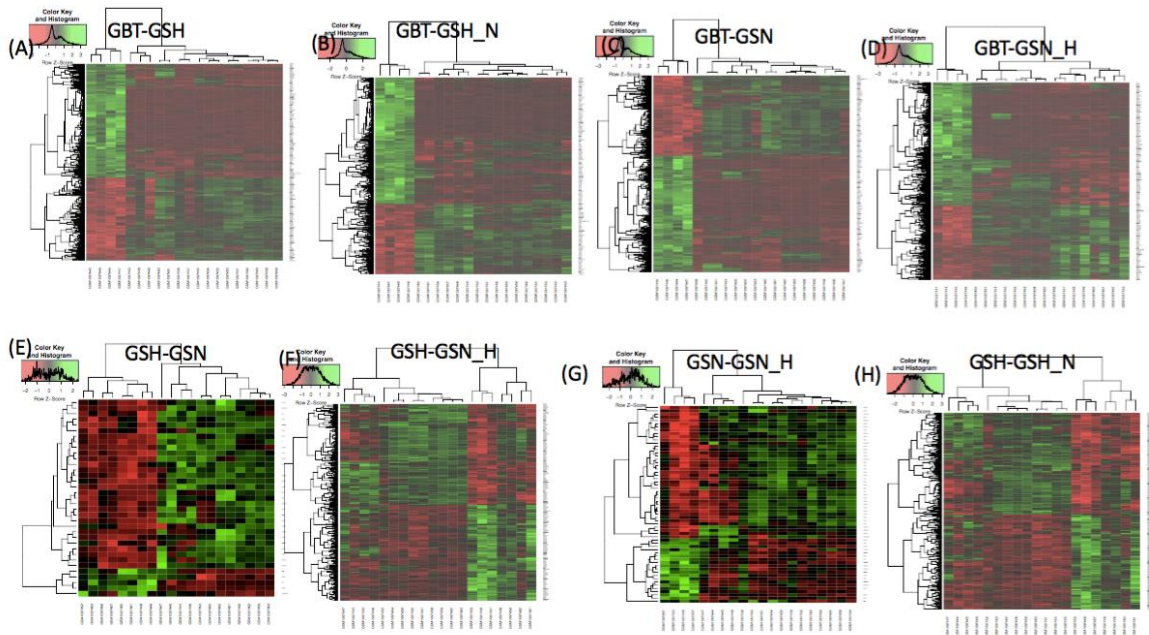

**Figure S2.** Heatmap plots of each paired treatments of DEGs of GSE45117 gene expression dataset.

Table S1. <https://www.dropbox.com/s/14n53c91apnw38p/Table%20S1.csv?dl=0>
